# Supplementary material
Source: PubMed Central journal article supplement (PMC7081154)
Supplement: jamapsychiatry-77-814-s001.pdf [file jamapsychiatry-77-814-s001.pdf]

## Supplementary Online Content

Kendler KS, Ohlsson H, Sundquist J, Sundquist K. An extended Swedish national adoption study of bipolar disorder illness and cross-generational familial association with schizophrenia and major depression. *JAMA Psychiatry*. Published online March 18, 2020. doi:10.1001/jamapsychiatry.2020.0223

**eMethods.** Detailed Methods

**eTable 1.** Cross-Design Weighted Estimates from Weighted Estimates from Parent to Offspring and Offspring to Parent Designs

**eTable 2.** Transmission From Bipolar Illness in Parents to Schizophrenia in the Offspring and From Schizophrenia in the Parents to Bipolar Illness in the Offspring

**eTable 3.** Cross-Parent Weighted Estimates From Weighted Estimates for Mothers and Fathers

**eTable 4.** Cross-Design Weighted Estimates From Weighted Estimates From Parent to Offspring and Offspring to Parent Designs

This supplementary material has been provided by the authors to give readers additional information about their work.

## **eMethods. Detailed Methods**

Details of Counties from Which we Obtained Primary Care Data:

Blekinge (2009-2016), Värmland (2005-2015), Kalmar (2007-2016), Sörmland (1997-2017), Uppsala (2005-2015), Västernorrland (2008-2015), Norrbotten (2009-2016), Gävleborg (2010-2016), Halland (2007-2014), Jönköping (2008-2014), Kronoberg (2006-2016), Skåne (1998-2013), Östergötland (1997-2014), Stockholm (2003-2016), and Västergötland (2000-2013). The time periods differ because of the timing of a structured digitalizing of patient records.

Definition of Hierarchy of Diagnoses:

To separate individuals with both registration for BP and NAP/SZ we calculated the number of registrations for BP and NAP/SZ. The table below illustrates how individuals were categorized as either registered for BP or NAP/SZ. We then applied the same algorithm to categorized individuals as either registered for NAP or SZ. Individuals with MD could not have a registration for BP, NAP or SZ.

|                                                  |              | Number of lifetime NAP diagnoses in the registers |                              |                              |                              |                              |
|--------------------------------------------------|--------------|---------------------------------------------------|------------------------------|------------------------------|------------------------------|------------------------------|
|                                                  |              | 1                                                 | 2                            | 3-5                          | 6-10                         | More than 10                 |
| Number of lifetime BP diagnoses in the registers | 1            | Last diagnosis                                    | Last diagnosis               | Most common diagnosis        | Most common diagnosis        | Most common diagnosis        |
|                                                  | 2            | Last diagnosis                                    | Majority of last 3 diagnoses | Majority of last 3 diagnoses | Most common diagnosis        | Most common diagnosis        |
|                                                  | 3-5          | Most common diagnosis                             | Majority of last 3 diagnoses | Majority of last 3 diagnoses | Majority of last 3 diagnoses | Majority of last 5 diagnoses |
|                                                  | 6-10         | Most common diagnosis                             | Most common diagnosis        | Majority of last 3 diagnoses | Majority of last 5 diagnoses | Majority of last 5 diagnoses |
|                                                  | More than 10 | Most common diagnosis                             | Most common diagnosis        | Majority of last 5 diagnoses | Majority of last 5 diagnoses | Majority of last 5 diagnoses |

### Calculation of the Genetic Correlations

The genetic correlation between two disorders were calculated as follows:  $r_G = \text{Cov}(AB) / \sqrt{V_A * V_B}$  where  $\text{Cov}(AB)$  equals two times the weighted average of the correlation between A and B from biological father to offspring and offspring to biological fathers from Not-lived with fathers families, and from Biological Fathers to offspring, Biological Mothers to offspring, Offspring to Biological Fathers and Offspring to Biological Mothers in adopted families.  $V_A$  equals two times the weighted correlation between A and A from biological father to offspring from Not-lived with father's families, and from Biological Fathers to offspring, Biological Mothers to offspring, in adopted families.  $V_B$  equals two times the weighted correlation between B and B from biological father to offspring from Not-lived with father's families, and from Biological Fathers to offspring, Biological Mothers to offspring, in adopted families. The 95% CI was created using bootstrapping; i.e., we created three samples (1,000,000 each) of correlations ( $V_A$ ,  $V_B$ ,  $\text{Cov}(AB)$ ) based on their mean and SE. Thereafter we calculated the  $r_G$  and used the 2.5 and 97.5th percentile for our confidence intervals.

Analyses for Narrowly Defined Schizophrenia

| eTable 1 – Cross-Design Weighted Estimates from Weighted Estimates from Parent to Offspring and Offspring to Parent Designs |                   |                             |                               |                        |                                   |
|-----------------------------------------------------------------------------------------------------------------------------|-------------------|-----------------------------|-------------------------------|------------------------|-----------------------------------|
| Disorders                                                                                                                   |                   | Bipolar Disorder in Parents | Bipolar Disorder in Offspring | Weighted Estimate      | P-value for test of heterogeneity |
| Bipolar Disorder and Major Depression                                                                                       | Genes and Rearing | 0.07<br>(0.06; 0.08)        | 0.10<br>(0.08; 0.11)          | 0.09<br>(0.07; 0.10)   | 0.005                             |
|                                                                                                                             | Genes Only        | 0.03<br>(-0.01; 0.07)       | 0.05<br>(0.01; 0.09)          | 0.04<br>(0.01; 0.07)   | 0.48                              |
|                                                                                                                             | Rearing Only      | 0.04<br>(-0.01; 0.08)       | 0.05<br>(0.01; 0.09)          | 0.05<br>(0.01; 0.08)   | 0.77                              |
| Bipolar Disorder and Broad Schizophrenia                                                                                    | Genes and Rearing | 0.13<br>(0.12; 0.15)        | 0.10<br>(0.09; 0.11)          | 0.12<br>(0.11; 0.13)   | 0.005                             |
|                                                                                                                             | Genes Only        | 0.13<br>(0.09; 0.17)        | 0.10<br>(0.06; 0.14)          | 0.12<br>(0.09; 0.14)   | 0.29                              |
|                                                                                                                             | Rearing Only      | -0.03<br>(-0.13; 0.06)      | -0.04<br>(-0.16; 0.07)        | -0.03<br>(-0.11; 0.04) | 0.90                              |

| eTable 2 Transmission from Bipolar Illness in Parents to Schizophrenia in the Offspring and from Schizophrenia in the Parents to Bipolar illness in the Offspring |           |                        |                      |                                |                        |                       |                                   |                                   |
|-------------------------------------------------------------------------------------------------------------------------------------------------------------------|-----------|------------------------|----------------------|--------------------------------|------------------------|-----------------------|-----------------------------------|-----------------------------------|
| Relationship                                                                                                                                                      | Phenotype | Sources of Resemblance | Intact Families      | Not-lived-with Father Families | Step-Father Families   | Adoptive Families     | Weighted Estimate Across Families | P-value for test of heterogeneity |
| Mother – Offspring                                                                                                                                                | BP to SZ  | Genes+ Rearing         | 0.11<br>(0.08; 0.14) | 0.09<br>(0.02; 0.16)           | 0.10<br>(-0.02; 0.23)  |                       | 0.11<br>(0.08; 0.13)              | 0.85                              |
|                                                                                                                                                                   | BP to SZ  | Genes only             |                      | -                              | -                      | 0.11<br>(-0.06; 0.28) | 0.11<br>(-0.06; 0.28)             | -                                 |
|                                                                                                                                                                   | BP to SZ  | Rearing only           |                      | -                              |                        | 0.02<br>(-0.24; 0.28) | 0.02<br>(-0.24; 0.28)             | -                                 |
| Father– Offspring                                                                                                                                                 | BP to SZ  | Genes+ Rearing         | 0.09<br>(0.06; 0.12) | -                              | -                      |                       | 0.09<br>(0.06; 0.12)              | -                                 |
|                                                                                                                                                                   | BP to SZ  | Genes only             | -                    | 0.09<br>(0.02; 0.17)           | -                      | 0.21<br>(0.01; 0.42)  | 0.10<br>(0.04; 0.18)              | 0.25                              |
|                                                                                                                                                                   | BP to SZ  | Rearing only           | -                    | -                              | -0.03<br>(-0.25; 0.18) |                       | -0.03<br>(-0.25; 0.18)            | -                                 |
| Mother – Offspring                                                                                                                                                | SZ to BPI | Genes+ Rearing         | 0.06<br>(0.02; 0.10) | 0.09<br>(0.01; 0.17)           | 0.07<br>(-0.11; 0.25)  |                       | 0.07<br>(0.03; 0.10)              | 0.80                              |
|                                                                                                                                                                   | SZ to BPI | Genes only             |                      |                                |                        | 0.10<br>(-0.02; 0.22) | 0.11<br>(-0.01; 0.22)             |                                   |
|                                                                                                                                                                   | SZ to BPI | Rearing only           |                      |                                |                        | Zero Cell             | -                                 |                                   |
| Father– Offspring                                                                                                                                                 | SZ to BPI | Genes+ Rearing         | 0.14<br>(0.10; 0.18) |                                |                        | Zero Cell             | 0.14<br>(0.10; 0.18)              |                                   |
|                                                                                                                                                                   | SZ to BPI | Genes only             |                      | 0.08<br>(0.01; 0.14)           |                        | 0.15<br>(-0.05; 0.35) | 0.09<br>(0.02; 0.15)              | 0.51                              |
|                                                                                                                                                                   | SZ to BPI | Rearing only           |                      |                                | Zero Cell              | Zero Cell             | -                                 | -                                 |

| eTable 3. Cross-Parent Weighted Estimates from Weighted Estimates for Mothers and Fathers |                   |                       |                        |                        |                                               |
|-------------------------------------------------------------------------------------------|-------------------|-----------------------|------------------------|------------------------|-----------------------------------------------|
| Disorders and Nature of Parent to Child Analyses                                          |                   | Mothers               | Fathers                | Weighted Estimate      | Uncorrected P-value for test of heterogeneity |
| BP to SZ                                                                                  | Genes and Rearing | 0.11<br>(0.08; 0.13)  | 0.09<br>(0.06; 0.12)   | 0.10<br>(0.08; 0.12)   | 0.34                                          |
|                                                                                           | Genes Only        | 0.11<br>(-0.06; 0.28) | 0.10<br>(0.04; 0.18)   | 0.10<br>(0.04; 0.16)   | 0.91                                          |
|                                                                                           | Rearing Only      | 0.02<br>(-0.24; 0.28) | -0.03<br>(-0.25; 0.18) | -0.01<br>(-0.17; 0.16) | 0.76                                          |
| SZ to BP                                                                                  | Genes and Rearing | 0.07<br>(0.03; 0.10)  | 0.14<br>(0.10; 0.18)   | 0.11<br>(0.08; 0.13)   | 0.006                                         |
|                                                                                           | Genes Only        | 0.11<br>(-0.01; 0.22) | 0.09<br>(0.02; 0.15)   | 0.10<br>(0.04; 0.15)   | 0.78                                          |
|                                                                                           | Rearing Only      | -                     | -                      | -                      |                                               |

| eTable 4. Cross-Design Weighted Estimates from Weighted Estimates from Parent to Offspring and Offspring to Parent Designs |                   |                        |                      |                        |                                               |
|----------------------------------------------------------------------------------------------------------------------------|-------------------|------------------------|----------------------|------------------------|-----------------------------------------------|
| Disorders                                                                                                                  |                   | Parent to Offspring    | Offspring to Parent  | Weighted Estimate      | Uncorrected P-value for test of heterogeneity |
| BP and SZ                                                                                                                  | Genes and Rearing | 0.10<br>(0.08; 0.12)   | 0.11<br>(0.08; 0.13) | 0.10<br>(0.08; 0.12)   | 0.63                                          |
|                                                                                                                            | Genes Only        | 0.10<br>(0.04; 0.16)   | 0.10<br>(0.04; 0.15) | 0.10<br>(0.06; 0.14)   | 1                                             |
|                                                                                                                            | Rearing Only      | -0.01<br>(-0.17; 0.16) |                      | -0.01<br>(-0.17; 0.16) | -                                             |
